# Supplementary material for: Circ_0061140 stimulates the malignant development of prostate cancer by targeting miR-1193
Source: PubMed Central journal article supplement — Transl Androl Urol. 2021 May;10(5):1928–38. doi: 10.21037/tau-20-1477 (PMC8185672; doi:10.21037/tau-20-1477), 2021-05
Supplement: tau-10-05-1928-dss.pdf [file tau-10-05-1928-dss.pdf]

## Data Sharing Statement

|                     |                                                                                                                                                     |                                                                                                                                                    |
|---------------------|-----------------------------------------------------------------------------------------------------------------------------------------------------|----------------------------------------------------------------------------------------------------------------------------------------------------|
| <b>Article Info</b> | http://dx.doi.org/10.21037/tau-20-1477                                                                                                              |                                                                                                                                                    |
| <b>Item</b>         | <b>Question</b>                                                                                                                                     | <b>Authors' Response<br/>(place "-" if not applicable)</b>                                                                                         |
| 1                   | Would you like to share data collected for your study to others?                                                                                    | Yes                                                                                                                                                |
| 2                   | If not, would you like to share the reason for your decision?                                                                                       | -                                                                                                                                                  |
| 3                   | What data in particular will be shared?                                                                                                             | The expression levels of circ_0061140 in PCa cells and tissues will be shared.                                                                     |
| 4                   | Any other documents will be shared? Such as study protocol, statistical analysis plan, informed consent form, clinical study report, analytic code. | Statistical analysis plan, informed consent form, and clinical study report will also be shared if requested.                                      |
| 5                   | When will data availability begin?                                                                                                                  | From the publication date.                                                                                                                         |
| 6                   | When will data availability end?                                                                                                                    | Two years within the publication date.                                                                                                             |
| 7                   | To whom will you share the data?                                                                                                                    | Medical oncologists and urinary surgeons who are interested in studies of circRNA.                                                                 |
| 8                   | For what type of analysis or purpose?                                                                                                               | Exploration of the mechanism of PCa development could be of great significance in elevating the detective and therapeutic efficacy for the disease |
| 9                   | How or where can the data/documents be obtained?                                                                                                    | Emails could be sent to the address below to obtain the shared data:<br>wongkein@zju.edu.cn                                                        |
| 10                  | Any other restrictions?                                                                                                                             | We may balance the potential benefits and risks for each request and then provide the data that could be shared.                                   |
